# Supplementary material for: Sport and exercise recommendations for pregnant athletes: a systematic scoping review
Source: HighWire-hosted journal article supplement (doi:10.1136/bmjsem-2022-001395), 2022-11-01
Supplement: bmjsem-2022-001395supp003_data_supplement.pdf [file bmjsem-2022-001395supp003_data_supplement.pdf]

## Online supplemental material appendix 3

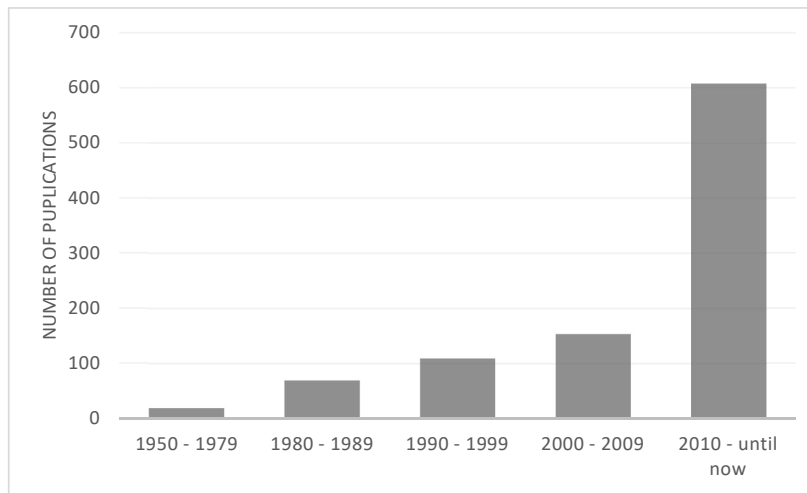

Number of publications of preliminary search itemised according to year of publication (search term: see chapter search strategy).
